# Supplementary material
Source: HighWire-hosted journal article supplement (https://rc.rcjournal.com/highwire/filestream/20613/field_highwire_adjunct_files/0/8599suppl.docx)
Supplement: 8599suppl.docx [file 8599suppl.docx]

| Supplementary Table 1. Documented Reason for NIV Failure | |
| --- | --- |
| **Reason** | **NIV Failure (n=70)** |
| Hypoxemia | 13 |
| Work-of-Breathing | 27 |
| Airway Protection | 20 |
| Hemodynamics | 8 |
| Coded | 2 |
